# Supplementary material for: Characterization of the Weissert oceanic anoxic event in lower Cretaceous limestones of the Guaniguanico terrain, Sierra de los Órganos, Western Cuba
Source: Frontiers journal article supplement (doi:10.3389/feart.2025.1549274), 2025-04-16
Supplement: Table_6.xlsx [file Table_6.xlsx]

## Sheet: Sheet1
	Lithology	TOC (Wt%)	TIC (CaCO3 wt%)	d13C org	d15N	Al (mg/g)	Si (mg/g)	Ti (mg/g)	Li (ppm)	Fe (mg/g)	P (mg/g)	Ba (ppt)	Ca (mg/g)	K (mg/g)	S (mg/g)	V (ppm)	Ni (ppm)	Co (ppm)	Cr (ppm)	Cu (ppm)	Mo (ppm)	Th (ppm)	TI (ppm)	U (ppm)
Lithology		1	2.89e-10	0.0741	1	1	1	1	1	1	1	1.38e-08	2.89e-10	1	1	6.39e-06	0.9766	1	0.9038	1	1	1	1	1
TOC (Wt%)	0.4204		2.89e-10	0.0279	1	1	1	1	1	1	1	8.53e-08	2.89e-10	1	1	3.12e-05	0.9976	1	0.9799	1	1	1	1	1
TIC (CaCO3 wt%)	15	14.58		2.89e-10	2.89e-10	2.89e-10	2.89e-10	2.89e-10	2.89e-10	2.89e-10	2.89e-10	0.02222	2.89e-10	2.89e-10	2.89e-10	0.0002702	2.89e-10	2.89e-10	2.89e-10	2.89e-10	2.89e-10	2.89e-10	2.89e-10	2.89e-10
d13C org	4.995	5.416	20		0.2253	0.02466	0.000674	0.1112	0.01764	0.06517	0.11	2.89e-10	2.89e-10	0.06222	0.04836	2.89e-10	2.96e-05	0.02182	6.9e-06	0.0009094	0.06377	0.09868	0.1139	0.0544
d15N	0.5769	0.9973	15.58	4.419		1	0.9956	1	1	1	1	1.25e-09	2.89e-10	1	1	6.42e-07	0.8388	1	0.6523	0.9975	1	1	1	1
Al (mg/g)	0.4698	0.04944	14.53	5.465	1.047		1	1	1	1	1	1.05e-07	2.89e-10	1	1	3.74e-05	0.9983	1	0.984	1	1	1	1	1
Si (mg/g)	1.714	1.293	13.29	6.709	2.291	1.244		0.9997	1	1	0.9997	1.57e-05	2.89e-10	1	1	0.00241	1	1	1	1	1	0.9998	0.9997	1
Ti (mg/g)	0.1942	0.6146	15.2	4.801	0.3826	0.6641	1.908		1	1	1	5.91e-09	2.89e-10	1	1	3e-06	0.9491	1	0.8372	0.9999	1	1	1	1
Li (ppm)	0.601	0.1806	14.4	5.597	1.178	0.1312	1.113	0.7952		1	1	1.84e-07	2.89e-10	1	1	6.01e-05	0.9993	1	0.9918	1	1	1	1	1
Fe (mg/g)	0.0586	0.3618	14.94	5.054	0.6355	0.4112	1.655	0.2528	0.5424		1	1.78e-08	2.89e-10	1	1	8.01e-06	0.9821	1	0.9197	1	1	1	1	1
P (mg/g)	0.1888	0.6092	15.19	4.807	0.3881	0.6586	1.903	0.005425	0.7898	0.2474		6.05e-09	2.89e-10	1	1	3.06e-06	0.9501	1	0.8394	0.9999	1	1	1	1
Ba (ppt)	9.495	9.075	5.507	14.49	10.07	9.025	7.781	9.689	8.894	9.437	9.684		2.89e-10	1.95e-08	3.16e-08	1	0.0003837	1.3e-07	0.00134	1.1e-05	1.86e-08	7.62e-09	5.62e-09	2.53e-08
Ca (mg/g)	38.61	38.19	23.61	43.61	39.19	38.14	36.9	38.8	38.01	38.55	38.8	29.12		2.89e-10	2.89e-10	2.89e-10	2.89e-10	2.89e-10	2.89e-10	2.89e-10	2.89e-10	2.89e-10	2.89e-10	2.89e-10
K (mg/g)	0.07954	0.3409	14.92	5.075	0.6564	0.3903	1.634	0.2738	0.5215	0.02094	0.2683	9.416	38.53		1	8.68e-06	0.9838	1	0.925	1	1	1	1	1
S (mg/g)	0.1906	0.2298	14.81	5.186	0.7674	0.2793	1.523	0.3848	0.4105	0.132	0.3794	9.305	38.42	0.111		1.32e-05	0.9907	1	0.9488	1	1	1	1	1
V (ppm)	8.017	7.596	6.985	13.01	8.594	7.547	6.303	8.211	7.416	7.958	8.206	1.478	30.59	7.937	7.826		0.02886	4.46e-05	0.07096	0.001815	8.32e-06	3.77e-06	2.86e-06	1.09e-05
Ni (ppm)	2.615	2.194	12.39	7.61	3.192	2.145	0.9009	2.809	2.014	2.556	2.803	6.881	36	2.535	2.424	5.402		0.9988	1	1	0.9829	0.9592	0.9469	0.9879
Co (ppm)	0.5183	0.09788	14.48	5.514	1.095	0.04844	1.195	0.7125	0.08275	0.4597	0.7071	8.977	38.09	0.4387	0.3277	7.499	2.096		0.9874	1	1	1	1	1
Cr (ppm)	3.001	2.581	12	7.997	3.578	2.532	1.288	3.196	2.4	2.943	3.19	6.494	35.61	2.922	2.811	5.015	0.3868	2.483		1	0.9222	0.8595	0.8324	0.9386
Cu (ppm)	1.621	1.2	13.38	6.616	2.198	1.151	0.09299	1.815	1.02	1.562	1.81	7.874	36.99	1.541	1.43	6.396	0.9939	1.102	1.381		1	0.9999	0.9999	1
Mo (ppm)	0.06846	0.3519	14.93	5.064	0.6453	0.4014	1.645	0.2627	0.5326	0.009857	0.2573	9.427	38.54	0.01108	0.1221	7.948	2.546	0.4498	2.933	1.552		1	1	1
Th (ppm)	0.1356	0.556	15.14	4.86	0.4413	0.6054	1.849	0.0586	0.7366	0.1942	0.05318	9.631	38.75	0.2152	0.3262	8.152	2.75	0.6539	3.137	1.756	0.2041		1	1
TI (ppm)	0.2061	0.6265	15.21	4.789	0.3707	0.676	1.92	0.01192	0.8072	0.2648	0.01734	9.701	38.82	0.2857	0.3967	8.223	2.821	0.7244	3.208	1.827	0.2746	0.07052		1
U (ppm)	0.1392	0.2812	14.86	5.135	0.7161	0.3306	1.575	0.3334	0.4618	0.08061	0.328	9.356	38.47	0.05967	0.05135	7.878	2.475	0.3791	2.862	1.482	0.07075	0.2748	0.3454
